# Supplementary material
Source: PubMed Central journal article supplement (PMC3350359)
Supplement: supp_blood-2011-11-392340_Document1.pdf [file supp_blood-2011-11-392340_Document1.pdf]

## APPENDIX

SWITCH Trial investigators and key contributors include the following: Baylor College of Medicine, Houston, TX (Brigitta U. Mueller, MD, Bogdan Dinu, MD); Boston Children's Hospital, Boston, MA (Matthew Heeney, MD, Meredith Anderson, Amber Smith, Tiffany Kang); Children's Hospital of Philadelphia, Philadelphia, PA (Janet L. Kwiatkowski, MD, MSCE, Kim Smith-Whitley, MD, PhD, Jeffrey Olson, MSPH, Vanessa Nixon, LaVerne Murphy); Children's Hospital of Pittsburgh at UPMC, Pittsburgh, PA (Lakshmanan Krishnamurti, MD, Regina McCollum, BSN, RN); Children's Memorial Hospital, Chicago, IL (Alexis Thompson, MD, MPH, Jillian Prado, Kelly Verel, CCRC, Ashley Brummel); Children's Mercy Hospital, Kansas, MO (Gerald Woods, MD, Julie Routhieaux, RN, PCNS, Anne Mehrhof, RN, MSN, CCRC, Kristin Stegenga, PhD, RN); Children's National Medical Center, Washington, DC (Lori Luchtman-Jones, MD, Caterina Minniti, MD, Sheronda D. Brown, MBA, MHCM, Tracy Boswell, MBA, Ryan Burnett); Children's Hospital Medical Center, Cincinnati, OH (Karen Kalinyak, MD, Laurie Vanderah, RN, Monique Lumpkin, MSW, Tammy Nordheim, BSN, RN, OCN, CCRP); Cohen Children's Medical Center of NY, New Hyde Park, NY (Sharon Singh, MD, Ellen Muir, RN); Columbia University, New York, NY (Margaret T. Lee, MD, Genia Billote, RN, MPH, MFA); East Carolina University, Greenville, NC (Charles Daeschner, MD, Diana Wyn Gordon, RN, MSN, CPON, Cynthia Brown, CCRP); Eastern Virginia Medical School, Norfolk, VA (William Owen, MD, Anthony Villella, MD, Terri Forsyth, PNP, Annette Slade, PNP, Lorrie Coggsdale, RN); Emory University/Children's Healthcare of Atlanta, Atlanta, GA (Clark Brown, MD, PhD, Ifeyinwa Osunkwo, MD, Peter Lane, MD, Brian Philbrook, MD, Terrell Faircloth, Korin Cherry, Elizabeth Record, CPNP, DNP, Eldrida Carter Randall, Ann Martha Felder, James Rhodes, PharmD); Cincinnati Medical College of Wisconsin, Milwaukee, WI (J. Paul Scott, MD, Danielle Jirovec, Lindsey Nelson); Medical University of South Carolina, Charleston, SC (Sherron M. Jackson, MD, Mary Ellen Cavalier, MD, Lisa Kuisel, RN, Jessica Peterson, RN, Betsy Rackoff); Nemours Children's Clinic, Jacksonville, FL (Cynthia Gauger, MD, Mary Warde, RN, BSN, CCRC), Nemours Children's Clinic, Orlando, FL (Ramamoorthy Nagasubramanian, MD, Leslie Natal, Dawn Cook, RN, BSN,); St. Joseph's Children's Hospital, Paterson, NJ (Rafael Barilari, MD, JoAnne Neville, CCRP); St. Jude Children's Research Hospital, Memphis, TN (Banu Aygun, MD, Winfred C. Wang,

MD, Eileen Hansbury, PA-C, Jennifer Larkin, Laura Martino, Lane Faughnan); SUNY-Downstate Medical Center, Brooklyn, NY (Scott Miller, MD, Kathy Rey, PAC, Lezlie Woods, RN); The Children's Hospital at Montefiore, Bronx, NY (Catherine Driscoll, MD, Lakeisha N. Nicholls, MA, RN, CPNP); The University of Texas Southwestern, Dallas, TX (Zora R. Rogers, M.D., Leah Adix, CCRP, Roxana Mars, RN, Brad Cook, RN, Jennifer Marshall, RN); University of Alabama, Birmingham, AL (Lee Hilliard, MD, Jeanine Dumas, Lindley Webb, Annelle Reed, MSN, CRNP); University of Miami, Miami, FL (Ofelia Alvarez, MD, Tally Hustace, ARNP, Patrice Williams, RN, Mary Donovan, RN); University of Mississippi Medical Center, Jackson, MS (Rathi Iyer, MD, Mary Gail Smith, MD, Stephanie Pepper, RN, Glenda Thomas, RN, Gloria Bishop, RN, Cindy Kendig, RN, Teresa Walker, RN); Vanderbilt University, Nashville, TN (Elizabeth Yang, MD, PhD, Lesley Ann Owen, RN, BSN, MSN); Wayne State University, Detroit, MI (Sharada Sarnaik, MD, Mary Murphy, Cynthia Burnett, Clarissa Shavers, PhD)

#### Consultants and Supporting Staff:

Robert Adams, MD, MS; Steven Pavlakis, MD; E. Steve Roach, MD; Corinne Hilbert; Judy Luden; Melanie Bonner, PhD; Alan Cohen, MD; Kathleen Helton, MD; Noah Sabin, MD; Jeff Creasy, MD; Zoltan Patay, MD, PhD; Fred Laningham, MD; Fred Hoffer, MD; Thad Howard, MS; Abdullah Kutlar, MD; Niren Patel, MBBS; Naomi Luban, MD; Beth McCarville, MD; Nicole Mortier, MHS, PA-C; Julie Richardson, PharmD, BCPS; Pamela Sylvestre, MD

#### Statistics and Data Management Center (SDMC):

Ronald W. Helms, PhD; Nancy Yovetich, PhD; Kevin Clark, MS; Julian Garro, MS; Allison Fowlkes; Wendy McBane; Megan Hsu; Danielle Boulet; Beth Olen; Ann Flaherty, CCRP; Jamie Spencer, CCRP; Christopher Woods; Karyn Mumma; Jennifer Stasiak

#### Medical Coordinating Center Supporting Staff:

Russell E. Ware, MD PhD; Joyce Banton, CCRP; Paul Eddlemon; Christina Radcliffe, CPhT, CCRP; William Schultz MHS, PA-C
